# Supplementary material
Source: PubMed Central journal article supplement (PMC6088157)
Supplement: JB.00303-18_zjb999094857s1.pdf [file JB.00303-18_zjb999094857s1.pdf]

**Table S2. Bacterial strains and plasmids used in this study**

| Strain/plasmid                              | Description                                                            | Source     |
|---------------------------------------------|------------------------------------------------------------------------|------------|
| <i>P. aeruginosa</i>                        |                                                                        |            |
| PAO1                                        | Reference strain                                                       | S. Lory    |
| PAO1 <i>carB</i> ::Tn                       | PW8995; Tn5 inactivation of <i>carB</i>                                | (1)        |
| PAO1 (V)                                    | PAO1 pMMB67EH vector control                                           | This study |
| PAO1 ( <i>pcarB</i> )                       | PAO1 with plasmid-encoded, inducible <i>carB</i>                       | This study |
| PAO1 <i>carB</i> ::Tn (V)                   | PAO1 <i>carB</i> ::Tn pMMB67EH vector control                          | This study |
| PAO1 <i>carB</i> ::Tn ( <i>pcarB</i> )      | PAO1 <i>carB</i> ::Tn with plasmid-encoded, inducible <i>carB</i>      | This study |
| <i>E. coli</i>                              |                                                                        |            |
| MG1655                                      | Reference strain                                                       | (2)        |
| JW0031                                      | Keio collection, $\Delta$ <i>carB</i> ::Km                             | (3)        |
| MG1655 $\Delta$ <i>carB</i>                 | MG1655 $\Delta$ <i>carB</i> ::Km transduced from JW0031                | This study |
| MG1655 ( <i>pgfp</i> )                      | MG1655 with plasmid-encoded, inducible <i>gfp</i>                      | (4)        |
| MG1655 $\Delta$ <i>carB</i> ( <i>pgfp</i> ) | MG1655 $\Delta$ <i>carB</i> with plasmid-encoded, inducible <i>gfp</i> | This study |
| DH5 $\alpha$                                | Cloning strain                                                         | Lab stock  |
| SM10 $\lambda$ pir                          | Mobilizing strain for biparental mating                                | (5)        |
| <i>S. aureus</i>                            |                                                                        |            |
| HG003                                       | Reference strain                                                       | (6)        |

|                        |                                                                 |            |
|------------------------|-----------------------------------------------------------------|------------|
| NE1454                 | JE2 Tn inactivated <i>carB</i>                                  | (7)        |
| HG003 <i>carB</i> ::Tn | HG003 Tn inactivated <i>carB</i>                                | This study |
| <i>Plasmids</i>        |                                                                 |            |
| pIT2                   | Tn5, Tet <sup>R</sup>                                           | (8)        |
| pMMB67EH               | P <sub>tac</sub> , Cb <sup>R</sup>                              | (9)        |
| <i>pcarB</i>           | pMMB67EH with P <sub>tac</sub> :: <i>carB</i> , Cb <sup>R</sup> | This study |
| <i>pgfp</i>            | pUA66 with P <sub>lacZ</sub> :: <i>gfp</i> , Km <sup>R</sup>    | (10)       |

Definitions: Cb<sup>R</sup>, carbenicillin resistance; Km<sup>R</sup>, kanamycin resistance; tet<sup>R</sup>, tetracycline resistance

## References

1. Jacobs MA, Alwood A, Thaipisuttikul I, Spencer D, Haugen E, Ernst S, Will O, Kaul R, Raymond C, Levy R, Chun-Rong L, Guenther D, Bovee D, Olson MV, Manoil C. 2003. Comprehensive transposon mutant library of *Pseudomonas aeruginosa*. Proc Natl Acad Sci U S A 100:14339-44.
2. Guyer MS, Reed RR, Steitz JA, Low KB. 1981. Identification of a sex-factor-affinity site in *E. coli* as gamma delta. Cold Spring Harb Symp Quant Biol 45 Pt 1:135-40.
3. Baba T, Ara T, Hasegawa M, Takai Y, Okumura Y, Baba M, Datsenko KA, Tomita M, Wanner BL, Mori H. 2006. Construction of *Escherichia coli* K-12 in-frame, single-gene knockout mutants: the Keio collection. Mol Syst Biol 2:2006 0008.

4. Shan Y, Brown Gandt A, Rowe SE, Deisinger JP, Conlon BP, Lewis K. 2017. ATP-Dependent Persister Formation in *Escherichia coli*. *MBio* 8.
5. Simon R, Priefer U, Puhler A. 1983. A Broad Host Range Mobilization System for In vivo Genetic-Engineering - Transposon Mutagenesis in Gram-Negative Bacteria. *Bio-Technology* 1:784-791.
6. Herbert S, Ziebandt AK, Ohlsen K, Schafer T, Hecker M, Albrecht D, Novick R, Gotz F. 2010. Repair of global regulators in *Staphylococcus aureus* 8325 and comparative analysis with other clinical isolates. *Infect Immun* 78:2877-89.
7. Fey PD, Endres JL, Yajjala VK, Widhelm TJ, Boissy RJ, Bose JL, Bayles KW. 2013. A genetic resource for rapid and comprehensive phenotype screening of nonessential *Staphylococcus aureus* genes. *MBio* 4:e00537-12.
8. Jacobs MA, Alwood A, Thaipisuttikul I, Spencer D, Haugen E, Ernst S, Will O, Kaul R, Raymond C, Levy R, Chun-Rong L, Guenther D, Bovee D, Olson MV, Manoil C. 2003. Comprehensive transposon mutant library of *Pseudomonas aeruginosa*. *Proc Natl Acad Sci U S A* 100:14339-44.
9. Furste JP, Pansegrau W, Frank R, Blocker H, Scholz P, Bagdasarian M, Lanka E. 1986. Molecular cloning of the plasmid RP4 primase region in a multi-host-range tacP expression vector. *Gene* 48:119-31.
10. Zaslaver A, Bren A, Ronen M, Itzkovitz S, Kikoin I, Shavit S, Liebermeister W, Surette MG, Alon U. 2006. A comprehensive library of fluorescent transcriptional reporters for *Escherichia coli*. *Nat Methods* 3:623-8.

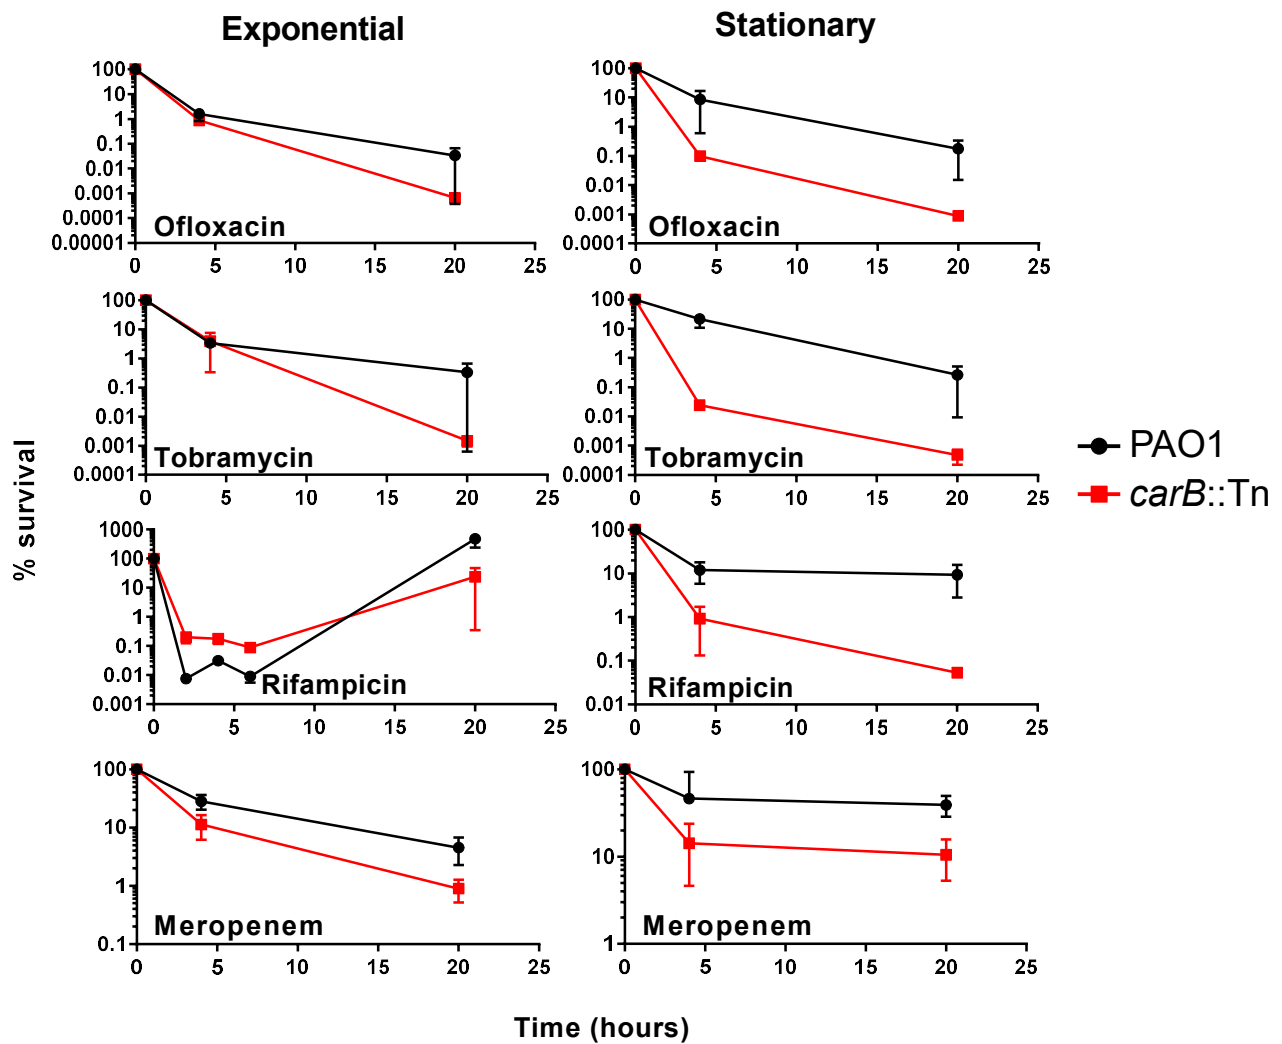

**Figure S1. Antibiotic time-kill experiments comparing survival of the *P. aeruginosa* wild-type PAO1 (black) and *carB::Tn* (red).** Cells were grown in LB media at 37°C with aeration for either 4.5 hours (exponential) or 16-18 hours (stationary) then exposed to either ofloxacin (20 µg/ml), tobramycin (10 µg/ml), rifampicin (320 µg/ml) or meropenem (5 µg/ml). Survival was determined at 4 and 20 hours post treatment via serial dilution and colony counting. Data are the mean of at least three biological replicates, bars represent SEM.

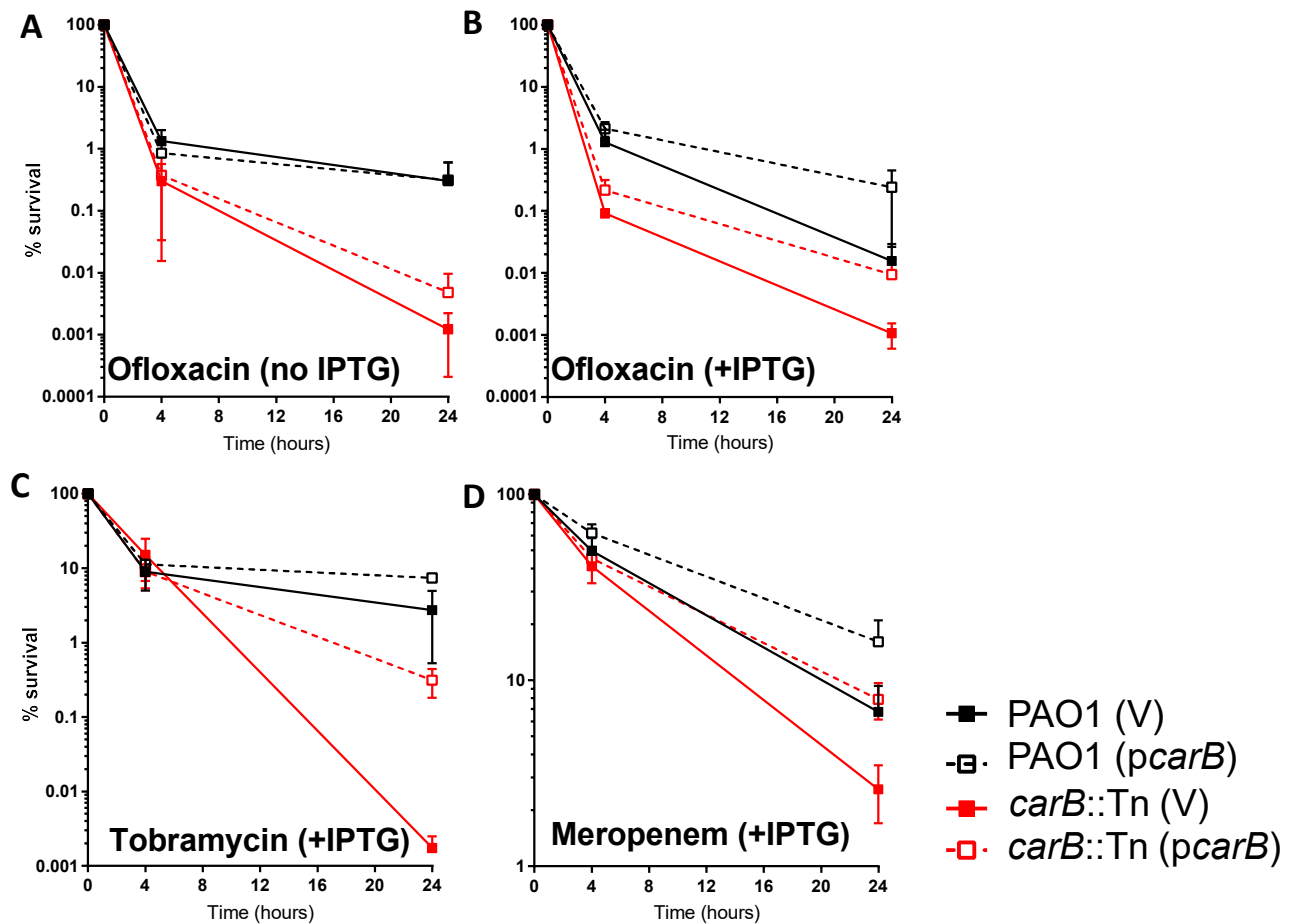

**Figure S2. Ectopic expression of *carB* under the control of an inducible promoter increases antibiotic tolerance.** (A) Cultures were grown in LB media at 37°C with aeration for 16-18 hours then exposed to either ofloxacin (20 µg/ml), tobramycin (10 µg/ml), or meropenem (5 µg/ml). (B-D) For induction of  $P_{tac}$ , media was supplemented with 1 mM IPTG. Survival was determined at 4 and 20 hours post treatment via serial dilution and colony counting. Data are the mean of at least three biological replicates, bars represent SEM.

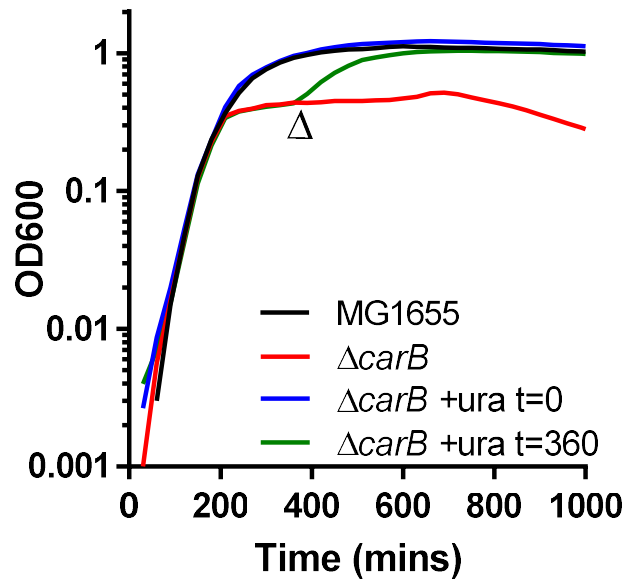

**Figure S3. Pyrimidine supplementation restores growth of the *E. coli*  $\Delta carB$  mutant** *E. coli* wild-type MG1655 (black) and  $\Delta carB$  mutant (red) were grown in LB media at 37° C. To determine the growth effect of pyrimidine supplementation, 2.5mM uracil (ura) was added at t=0 (blue) or during stationary phase (green, uracil added at open arrow). Data represented is the mean of triplicate measures.
